# Supplementary material
Source: MDPI journal article supplement (https://www.mdpi.com/2072-4292/14/5/1268)
Supplement: s1 [file s1]

Table S1. Results from the granulometric analyses from the 50 grab samples in the Bagnoli-Coroglio calibration area. The results include the percentages from all granulometric classes (according to Udden & Wentworth) and the corresponding phi values (according to Krumbein).

|           | 2000 to<br>4000 | 1000 to 2000                | 500 to 1000           | 250 to 500            | 250 to 125          | 63 to 125                 | 31 to 63               | 16 to 31               | 8 to 16              | 4 to 8                     | < 4         | $\mu\text{m}$ | Udden &<br>Wentworth |
|-----------|-----------------|-----------------------------|-----------------------|-----------------------|---------------------|---------------------------|------------------------|------------------------|----------------------|----------------------------|-------------|---------------|----------------------|
|           | -2 to -1        | -1 to 0                     | 0 to 1                | 1 to 2                | 2 to 3              | 3 to 4                    | 4 to 5                 | 5 to 6                 | 6 to 7               | 7 to 8                     | > 8         | phi           | Krumbein             |
| Sample ID | Gravel<br>(G) % | Very Coarse Sand<br>(VCS) % | Coarse Sand<br>(CS) % | Medium Sand<br>(MS) % | Fine Sand<br>(FS) % | Very Fine Sand<br>(VFS) % | Coarse Silt<br>(CSi) % | Medium Silt<br>(MSi) % | Fine Silt<br>(FSi) % | Very fine silt<br>(VFSi) % | Clay<br>(C) | Mean<br>Phi   | Class                |
| 2         | 1.4             | 8.2                         | 18.5                  | 19.6                  | 34.0                | 14.9                      | 3.4                    | 0.0                    | 0.0                  | 0.0                        | 0.0         | 1.86          | MS                   |
| 8         | 0.2             | 1.1                         | 3.8                   | 14.4                  | 44.2                | 34.4                      | 2.0                    | 0.0                    | 0.0                  | 0.0                        | 0.0         | 2.69          | FS                   |
| 10        | 0.1             | 2.9                         | 25.2                  | 43.0                  | 25.0                | 2.9                       | 1.0                    | 0.0                    | 0.0                  | 0.0                        | 0.0         | 1.52          | MS                   |
| 15        | 1.2             | 0.8                         | 1.7                   | 16.5                  | 51.0                | 21.5                      | 2.3                    | 2.0                    | 1.3                  | 0.6                        | 1.2         | 2.64          | FS                   |
| 16        | 8.3             | 11.2                        | 22.1                  | 24.3                  | 16.6                | 15.0                      | 2.4                    | 0.0                    | 0.0                  | 0.0                        | 0.0         | 1.38          | MS                   |
| 22        | 0.8             | 0.6                         | 1.6                   | 8.2                   | 42.3                | 37.9                      | 3.0                    | 2.0                    | 1.3                  | 0.7                        | 1.5         | 2.95          | FS                   |
| 28        | 2.9             | 2.3                         | 2.9                   | 6.2                   | 26.3                | 32.8                      | 5.4                    | 3.3                    | 4.3                  | 4.7                        | 9.1         | 3.95          | VFS                  |
| 32        | 1.0             | 0.6                         | 0.9                   | 5.1                   | 30.0                | 52.2                      | 4.4                    | 1.9                    | 1.4                  | 0.7                        | 2.0         | 3.14          | VFS                  |
| 39        | 2.1             | 1.2                         | 1.7                   | 13.5                  | 58.1                | 19.1                      | 4.2                    | 0.0                    | 0.0                  | 0.0                        | 0.0         | 2.58          | FS                   |
| 41        | 16.9            | 7.3                         | 7.4                   | 12.0                  | 35.5                | 17.7                      | 3.2                    | 0.0                    | 0.0                  | 0.0                        | 0.0         | 1.49          | MS                   |
| 43        | 1.1             | 1.8                         | 1.1                   | 2.3                   | 16.1                | 44.3                      | 10.8                   | 5.9                    | 5.0                  | 4.1                        | 7.6         | 4.13          | CSi                  |
| 50        | 14.4            | 4.0                         | 3.8                   | 4.4                   | 8.3                 | 22.7                      | 10.9                   | 8.1                    | 7.0                  | 6.1                        | 10.5        | 3.39          | VFS                  |
| 70        | 0.3             | 0.4                         | 0.5                   | 3.4                   | 43.0                | 48.3                      | 4.1                    | 0.0                    | 0.0                  | 0.0                        | 0.0         | 3.03          | VFS                  |
| 77        | 20.4            | 24.8                        | 22.8                  | 16.6                  | 8.0                 | 3.7                       | 3.6                    | 0.0                    | 0.0                  | 0.0                        | 0.0         | 0.39          | CS                   |
| 82        | 0.9             | 0.7                         | 3.4                   | 18.2                  | 60.0                | 14.3                      | 2.6                    | 0.0                    | 0.0                  | 0.0                        | 0.0         | 2.37          | FS                   |
| 84        | 22.5            | 11.1                        | 12.8                  | 17.6                  | 19.1                | 8.8                       | 1.6                    | 2.2                    | 2.1                  | 1.1                        | 1.3         | 1.11          | MS                   |
| 90        | 21.0            | 11.2                        | 16.3                  | 25.0                  | 20.2                | 3.9                       | 2.4                    | 0.0                    | 0.0                  | 0.0                        | 0.0         | 0.86          | CS                   |
| 94        | 2.7             | 2.9                         | 9.0                   | 23.0                  | 22.9                | 24.9                      | 6.5                    | 2.5                    | 1.4                  | 1.0                        | 3.2         | 2.52          | FS                   |
| 96        | 0.4             | 1.1                         | 2.5                   | 8.7                   | 70.4                | 16.4                      | 0.4                    | 0.0                    | 0.0                  | 0.0                        | 0.0         | 2.55          | FS                   |
| 97        | 2.2             | 9.6                         | 37.7                  | 30.0                  | 19.0                | 1.3                       | 0.1                    | 0.0                    | 0.0                  | 0.0                        | 0.0         | 1.12          | MS                   |
| 98        | 0.4             | 1.9                         | 14.1                  | 41.3                  | 37.6                | 4.4                       | 0.2                    | 0.0                    | 0.0                  | 0.0                        | 0.0         | 1.83          | MS                   |
| 99        | 4.4             | 14.9                        | 44.0                  | 32.7                  | 3.7                 | 0.2                       | 0.0                    | 0.0                    | 0.0                  | 0.0                        | 0.0         | 0.71          | CS                   |
| 100       | 15.4            | 24.8                        | 35.7                  | 23.0                  | 0.9                 | 0.1                       | 0.1                    | 0.0                    | 0.0                  | 0.0                        | 0.0         | 0.22          | CS                   |
| 101       | 19.1            | 32.6                        | 34.9                  | 12.0                  | 1.2                 | 0.1                       | 0.1                    | 0.0                    | 0.0                  | 0.0                        | 0.0         | -0.04         | VCS                  |

|     |      |      |      |      |      |      |      |      |      |      |      |      |     |
|-----|------|------|------|------|------|------|------|------|------|------|------|------|-----|
| 102 | 5.7  | 16.4 | 45.5 | 30.0 | 2.0  | 0.2  | 0.1  | 0.0  | 0.0  | 0.0  | 0.0  | 0.60 | CS  |
| 103 | 0.3  | 0.5  | 1.5  | 5.6  | 56.9 | 34.1 | 0.9  | 0.0  | 0.0  | 0.0  | 0.0  | 2.76 | FS  |
| 104 | 0.5  | 0.7  | 1.2  | 2.4  | 11.8 | 62.2 | 9.3  | 3.9  | 2.7  | 1.9  | 3.4  | 3.69 | VFS |
| 105 | 6.3  | 6.0  | 4.3  | 2.5  | 11.8 | 59.9 | 4.0  | 1.9  | 1.3  | 0.8  | 1.3  | 2.69 | FS  |
| 106 | 4.1  | 25.6 | 15.7 | 3.5  | 5.6  | 36.0 | 5.1  | 1.9  | 1.0  | 0.6  | 0.9  | 1.83 | MS  |
| 107 | 55.4 | 19.1 | 4.0  | 3.8  | 9.1  | 6.1  | 2.6  | 0.0  | 0.0  | 0.0  | 0.1  | 0.07 | CS  |
| 108 | 2.0  | 1.5  | 2.6  | 6.9  | 11.8 | 48.1 | 14.6 | 5.0  | 2.6  | 1.7  | 3.3  | 3.52 | VFS |
| 109 | 2.8  | 7.5  | 10.5 | 9.4  | 16.3 | 43.9 | 4.7  | 1.8  | 1.1  | 0.7  | 1.2  | 2.50 | FS  |
| 110 | 0.3  | 0.4  | 0.5  | 1.1  | 16.0 | 74.1 | 4.3  | 1.1  | 0.8  | 0.5  | 0.9  | 3.40 | VFS |
| 111 | 2.0  | 1.0  | 2.5  | 5.2  | 10.7 | 35.8 | 15.5 | 9.2  | 6.4  | 4.4  | 7.4  | 4.22 | CSi |
| 112 | 1.6  | 1.6  | 2.4  | 2.6  | 7.7  | 43.7 | 14.0 | 7.2  | 5.9  | 4.7  | 8.8  | 4.46 | CSi |
| 113 | 0.2  | 0.2  | 0.2  | 0.5  | 2.1  | 25.4 | 27.5 | 15.1 | 8.5  | 6.3  | 14.2 | 5.34 | MSi |
| 114 | 0.0  | 0.1  | 0.1  | 0.1  | 0.6  | 8.1  | 23.5 | 22.2 | 14.7 | 9.6  | 20.9 | 6.11 | FSi |
| 115 | 0.7  | 0.2  | 0.3  | 0.5  | 1.8  | 18.7 | 25.5 | 17.4 | 10.4 | 7.4  | 17.2 | 5.62 | MSi |
| 116 | 8.3  | 2.8  | 2.6  | 3.2  | 9.9  | 20.5 | 15.3 | 13.9 | 10.5 | 4.6  | 8.4  | 4.20 | CSi |
| 117 | 2.3  | 1.2  | 1.4  | 3.1  | 12.4 | 18.7 | 17.6 | 16.7 | 10.5 | 5.4  | 10.8 | 4.77 | CSi |
| 118 | 0.8  | 0.5  | 0.4  | 0.9  | 3.2  | 11.4 | 19.1 | 17.2 | 13.3 | 10.2 | 23.1 | 6.00 | FSi |
| 119 | 0.4  | 0.7  | 0.9  | 1.9  | 8.9  | 17.1 | 20.9 | 14.5 | 10.0 | 7.6  | 17.1 | 5.41 | MSi |
| 120 | 4.0  | 15.7 | 31.9 | 29.9 | 12.1 | 4.9  | 1.6  | 0.0  | 0.0  | 0.0  | 0.0  | 0.98 | CS  |
| 121 | 0.2  | 0.3  | 0.3  | 0.5  | 3.1  | 14.2 | 21.2 | 16.9 | 12.3 | 9.4  | 21.6 | 5.89 | MSi |
| 122 | 0.3  | 0.2  | 0.2  | 0.3  | 0.6  | 7.4  | 19.8 | 18.6 | 15.0 | 11.9 | 25.9 | 6.31 | FSi |
| 123 | 18.3 | 17.0 | 14.5 | 11.0 | 12.9 | 15.1 | 3.0  | 1.6  | 1.6  | 1.7  | 3.4  | 1.23 | MS  |
| 124 | 9.7  | 36.8 | 47.4 | 4.5  | 1.0  | 0.5  | 0.1  | 0.0  | 0.0  | 0.0  | 0.0  | 0.01 | CS  |
| 125 | 1.7  | 12.9 | 42.6 | 31.2 | 9.2  | 2.2  | 0.2  | 0.0  | 0.0  | 0.0  | 0.0  | 0.91 | CS  |
| 126 | 20.4 | 30.3 | 26.3 | 14.3 | 6.6  | 1.7  | 0.6  | 0.0  | 0.0  | 0.0  | 0.0  | 0.16 | CS  |
| 127 | 0.6  | 1.8  | 8.1  | 25.0 | 44.0 | 18.8 | 1.9  | 0.0  | 0.0  | 0.0  | 0.0  | 2.27 | FS  |
